# Supplementary material for: BcGR1.1, a Cytoplasmic Localized Glutathione Reductase, Enhanced Tolerance to Copper Stress in Arabidopsis thaliana
Source: MDPI journal article supplement (doi:10.3390/antiox11020389), 2022-02-15
Supplement: s1 [file s1]

## Supplementary material

Table S1. Primer sequence

| Primer use                                      | Primer name       | Primer sequence                                    |
|-------------------------------------------------|-------------------|----------------------------------------------------|
| Gene cloning                                    | BcGR1.1-F         | ATGGGGAGGAAGATGCTTGCT                              |
|                                                 | BcGR1.1-R         | TCATAGACTCGTCTTGGGTT                               |
|                                                 | BcGR1.2-F         | ATGGCGAGGAAGATGCTTTCT                              |
|                                                 | BcGR1.2-R         | TCATAGACTCGTTTGAGGTT                               |
|                                                 | BcGR2.1-F         | ATGGCTACGACTCCGAAGCTG                              |
|                                                 | BcGR2.1-R         | TTATTGCTCGGACTCCTCCTT                              |
|                                                 | BcGR2.2-F         | ATGGCTTCGACTCCGAAGCTA                              |
|                                                 | BcGR2.2-R         | CTAGACAGCTGTTTTAGCCTC                              |
| Promoter                                        | ProBcGR1.1-F      | AGATTTGCGATCGGATCAGAACCGT                          |
| Cloning                                         | ProBcGR1.1-R      | CGTCAGCAAGCATCTTCCTCCCCAT                          |
| Construction of subcellular localization vector | PR101-BcGR1.1-F   | AAGTTCTTCACTGTTGATACATATG<br>ATGGGGAGGAAGATGCTTGCT |
|                                                 | PR101-BcGR1.1-R   | CCTCGCCCTTGCTCACCATGGATCC<br>TAGACTCGTCTTGGGTT     |
|                                                 | PR101-BcGR1.2-F   | AAGTTCTTCACTGTTGATACATATG<br>ATGGCGAGGAAGATGCTTTCT |
|                                                 | PR101-BcGR1.2-R   | CCTCGCCCTTGCTCACCATGGATCC<br>TAGACTCGTTTGAGGTT     |
|                                                 | PR101-BcGR2.1-F   | AAGTTCTTCACTGTTGATACATATG<br>ATGGCTACGACTCCGAAGCTG |
|                                                 | PR101-BcGR2.1-R   | CCTCGCCCTTGCTCACCATGGATCC<br>TTGCTCGGACTCCTCCTT    |
|                                                 | PR101-BcGR2.2-F   | AAGTTCTTCACTGTTGATACATATG<br>ATGGCTTCGACTCCGAAGCTA |
|                                                 | PR101-BcGR2.2-R   | CCTCGCCCTTGCTCACCATGGATCC<br>GACAGCTGTTTTAGCCTC    |
| Construction of overexpression vector           | PTCK303-BcGR1.1-F | CCGGATCCATGGGGAGGAAGATGCTTGCT                      |
|                                                 | PTCK303-BcGR1.1-R | CC GAGCTC TCATAGACTCGTCTTGGGTT                     |
| qPCR                                            | qAtActin-F        | TTGACAATTGATGCAAACAATGACG                          |
|                                                 | qAtActin-R        | CCATTGCTTAATTCCACGGACAAAC                          |
|                                                 | qBcGAPC-F         | AGAGCCGCTTCCTTCAACATCATT                           |
|                                                 | qBcGAPC-R         | TGGGCACACGGAAGGACATACC                             |

|                 |            |                         |
|-----------------|------------|-------------------------|
|                 | qBcGR1.1-F | AAATGAGGGCACTTGTGGCT    |
|                 | qBcGR1.1-R | AAATAGCACCACATCCGCCA    |
|                 | qBcGR1.2-F | GAGAGCTTAACAAGGCCGCA    |
|                 | qBcGR1.2-R | CAGAAAACCTAGCCGCACGA    |
|                 | qBcGR2.1-F | CTCCATCTCTTCAAACCCTCTGC |
|                 | qBcGR2.1-R | AGTAAGGTGAGACGGGGACG    |
|                 | qBcGR2.2-F | TTCGACTCCGAAGCTAACCAC   |
|                 | qBcGR2.2-R | GGAGGGAACGAGAGGTTGGA    |
| <hr/>           |            |                         |
| Hygromycin      | Hyg-F      | GGTCGCGGAGGCTATGGATGC   |
| resistance gene |            |                         |
| detection       | Hyg-R      | GCTTCTGCGGGCGATTTGTGT   |
| primers         |            |                         |

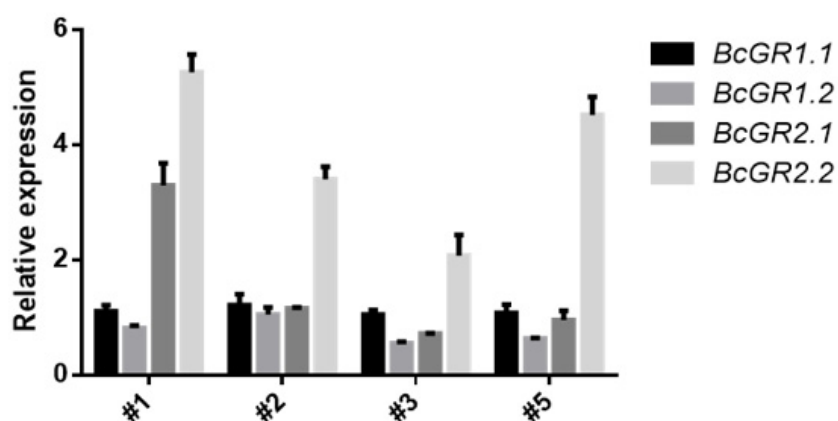

Figure S1. Analysis of homologous gene expression in *BcGR1.1* silenced plant.

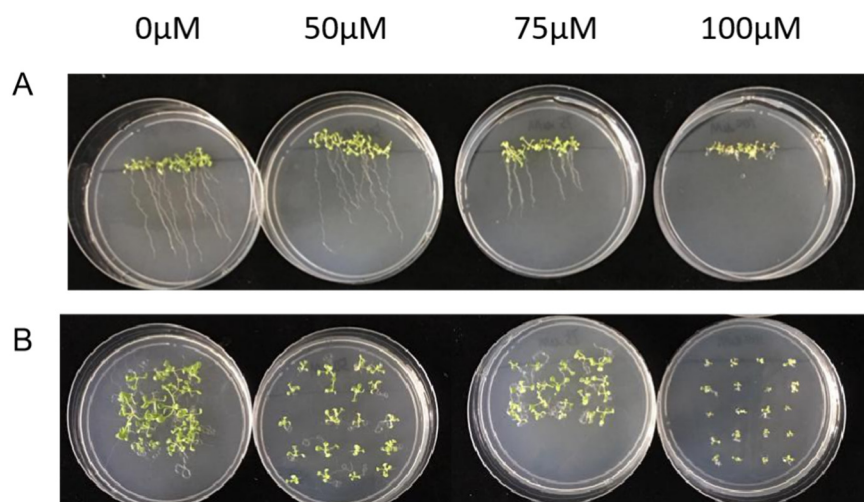

Figure S2. Growth status of seedlings in the copper stress treatment pre-test. After sterilization, WT Arabidopsis seeds were evenly spread on 1/2MS, placed at 4 degrees for 2

days, and grown under normal growth conditions for 3 days. When the seeds have just germinated, placed them neatly on 1/2MS containing varying concentrations of copper as needed. WT of *Arabidopsis thaliana* was treated with different concentrations of copper and photographed after growing for 15 days. (A) : grow vertically after treatment; (B) : grow horizontally after treatment. Petri dishes are 9cm in diameter.

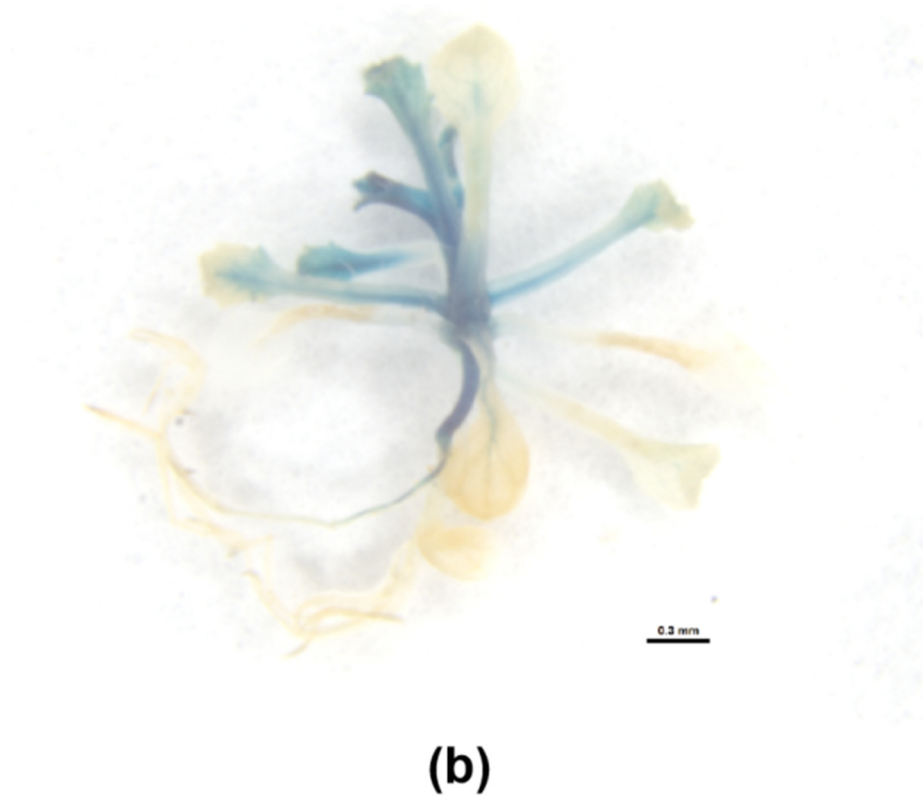

Figure S3. Tissue specific expression analysis of *BcGR1.1* (GUS staining).

We cloned the promoter sequence of *BcGR1.1*, constructed it in upstream of GUS, and transferred it into *Arabidopsis thaliana*. After screening, the positive seedlings were detected by GUS. Results in Figure 3b showed *BcGR1.1* is expressed in all tissues and organs. The highest expression was found in the stem, followed by the main root, young leaves and veins, and the lowest expressions were in old leaves and root hairs.
